# Supplementary material for: The Long-Lasting Influenza: The Impact of Fetal Stress During the 1918 Influenza Pandemic on Socioeconomic Attainment and Health in Sweden, 1968–2012
Source: Springer Nature journal article supplement (doi:10.1007/s13524-019-00799-x), 2019-07-19
Supplement: MOESM1 [file 16967146]

Appendix

Table A1: Sample means. Standard deviation within brackets.

|                                                  | Occupational<br>status in<br>1970 | Income in<br>1970 | Hospitalization,<br>age 54-87 |               | Mortality, age 54-87 |       |
|--------------------------------------------------|-----------------------------------|-------------------|-------------------------------|---------------|----------------------|-------|
|                                                  | Men                               | Men               | Men                           | Women         | Men                  | Women |
| Camsis                                           | 47.4<br>[14.6]                    |                   |                               |               |                      |       |
| Income (1000's)                                  |                                   | 34.9<br>[28.1]    |                               |               |                      |       |
| Hospitalization during current year (%)          |                                   |                   | 19.1                          | 16.6          |                      |       |
| Days of hospitalization during current year (%): |                                   |                   |                               |               |                      |       |
| 0 days                                           |                                   |                   | 80.9                          | 83.4          |                      |       |
| 1-5 days                                         |                                   |                   | 7.5                           | 6.1           |                      |       |
| 6-10 days                                        |                                   |                   | 3.9                           | 3.5           |                      |       |
| 11-20 days                                       |                                   |                   | 3.4                           | 3.2           |                      |       |
| 21-30 days                                       |                                   |                   | 1.6                           | 1.4           |                      |       |
| 31 days or more                                  |                                   |                   | 2.7                           | 2.5           |                      |       |
| Days of hospitalization during current year      |                                   |                   | 3.2<br>[13.8]                 | 2.9<br>[13.1] |                      |       |
| Mortality, all cause (%)                         |                                   |                   |                               |               | 78.0                 | 61.0  |
| Mortality, cancer (%)                            |                                   |                   |                               |               | 21.5                 | 17.2  |
| Mortality, cardiovascular (%)                    |                                   |                   |                               |               | 43.6                 | 32.1  |
| Mortality, respiratory (%)                       |                                   |                   |                               |               | 7.2                  | 5.6   |
| Mortality, others (%)                            |                                   |                   |                               |               | 5.8                  | 6.1   |

|                          |         |         |           |            |         |         |
|--------------------------|---------|---------|-----------|------------|---------|---------|
| Birth year               | 1919.6  | 1919.5  | 1919.8    | 1919.8     | 1919.5  | 1919.5  |
|                          | [3.4]   | [3.4]   | [3.4]     | [3.4]      | [3.4]   | [3.4]   |
| Exposure trimester 1 (%) | 4.2     | 4.1     | 4.2       | 4.2        | 4.1     | 4.2     |
| Exposure trimester 2 (%) | 4.1     | 4.1     | 4.0       | 4.1        | 4.1     | 4.1     |
| Exposure trimester 3 (%) | 3.6     | 3.6     | 3.6       | 3.6        | 3.6     | 3.6     |
| Individuals              | 420 985 | 450 245 | 423 748   | 458 488    | 442 521 | 471 547 |
| Observations             | 420 985 | 450 245 | 9 077 746 | 11 281 861 | 442 521 | 471 547 |

Figure A1: Variation in timing and influenza intensity by selected Swedish counties. Crude Mortality Rate (per 1,000), by month

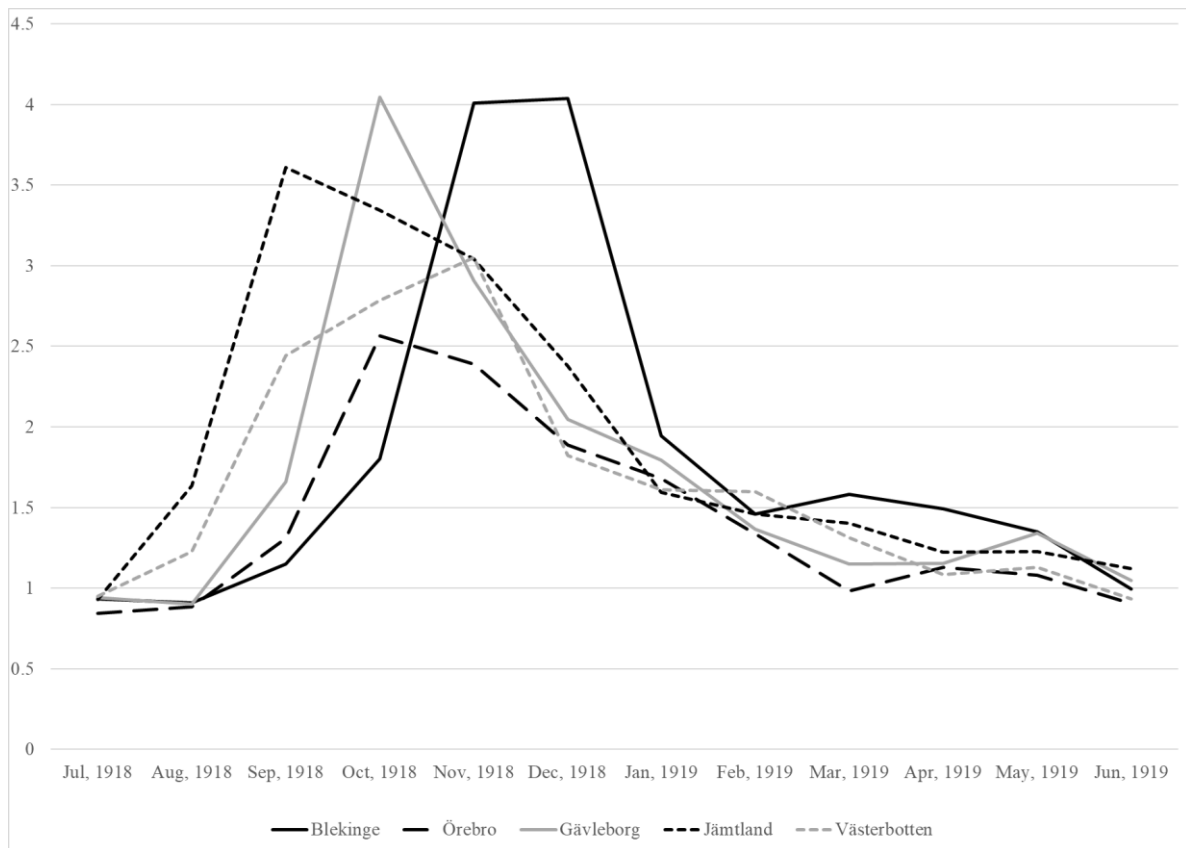

Source: Befolkningsrörelsen, 1918-1920

Figure A2. Influenza morbidity rate by age at different work places in Sweden.

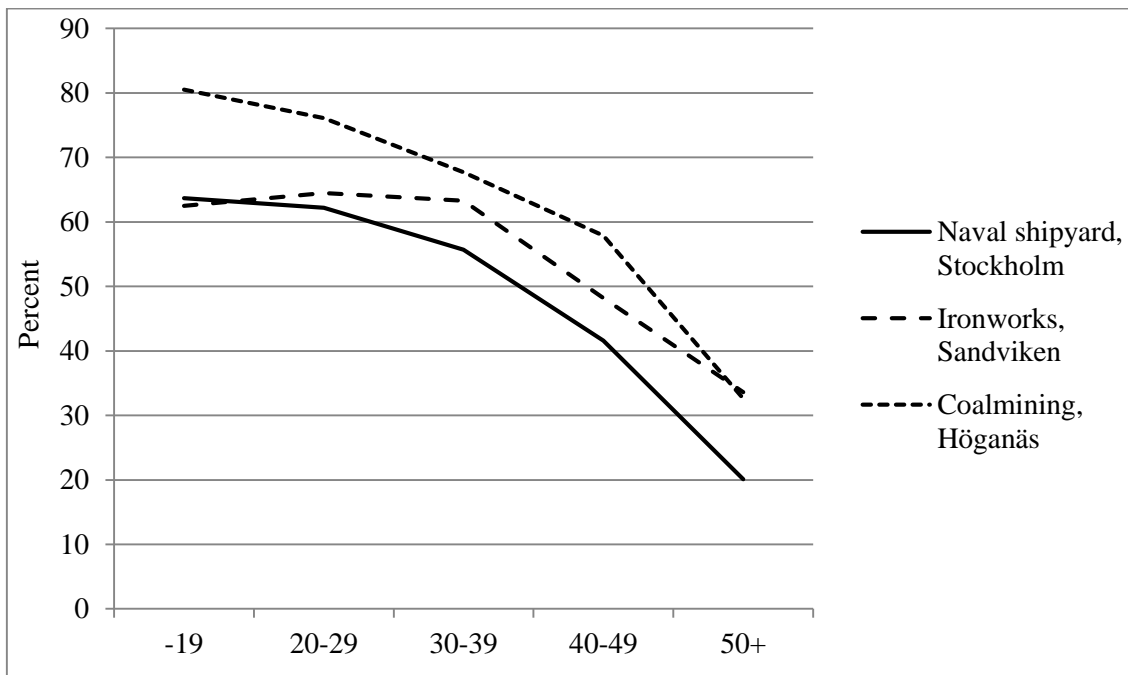

Sources: Alling 1919, Gibson 1919, Widstrand 1918.

Figure A3: Cumulative distribution of morbidity and mortality due to the Spanish flu from July 1818 to June 1919.

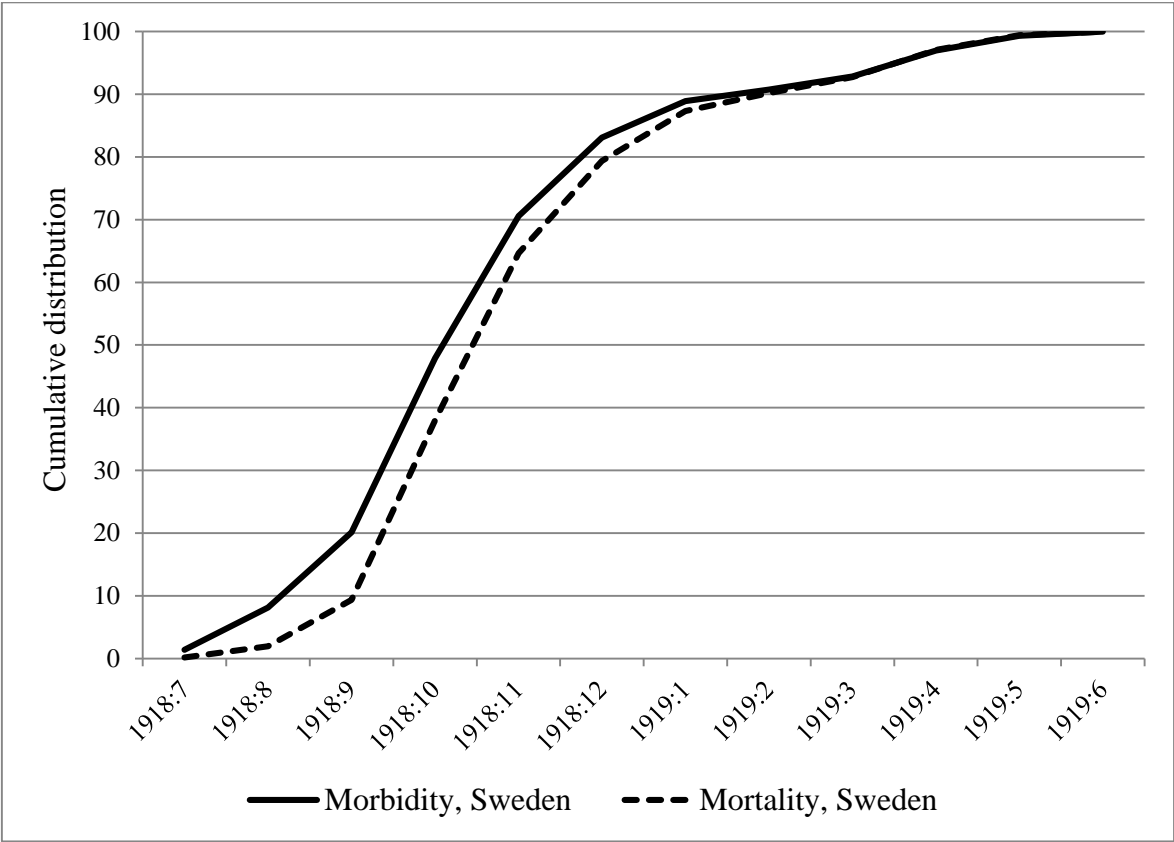

Sources: Lindhagen 1926, Allmän hälso- och sjukvård år 1918 and 1919, for Sweden

Figure A4. Influenza and pneumonia mortality in 1918 by age and sex, Sweden.

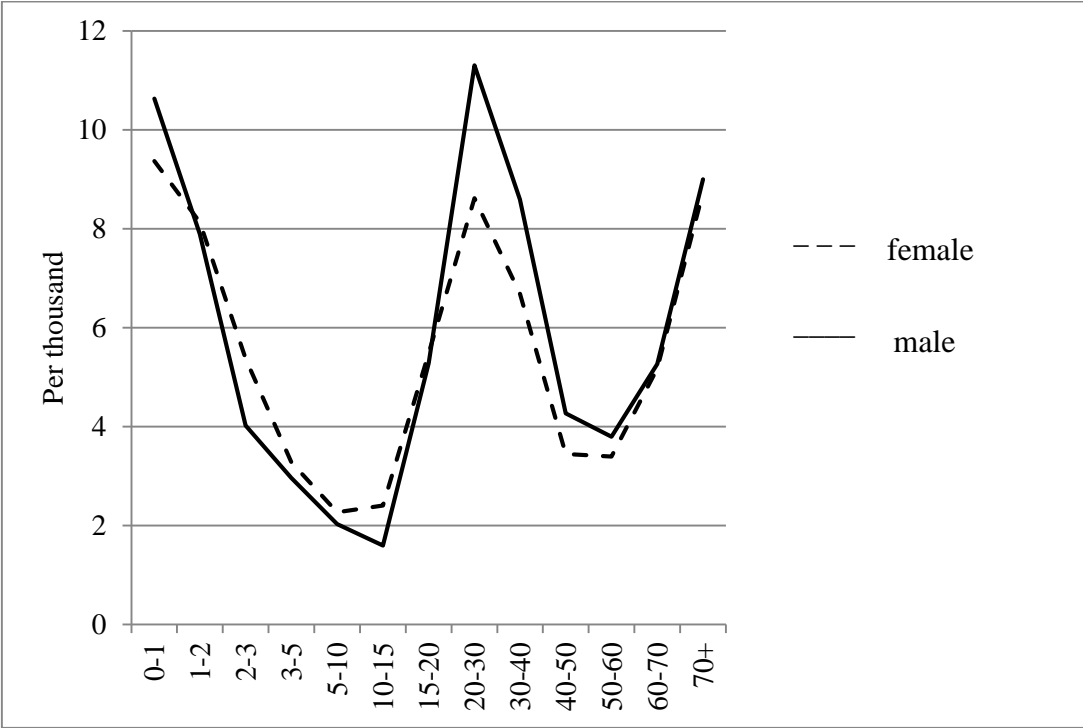

Source: Befolkningsrörelsen 1918.

Figure A5. All-cause mortality by age and sex in 1918 relative to 1917, Sweden.

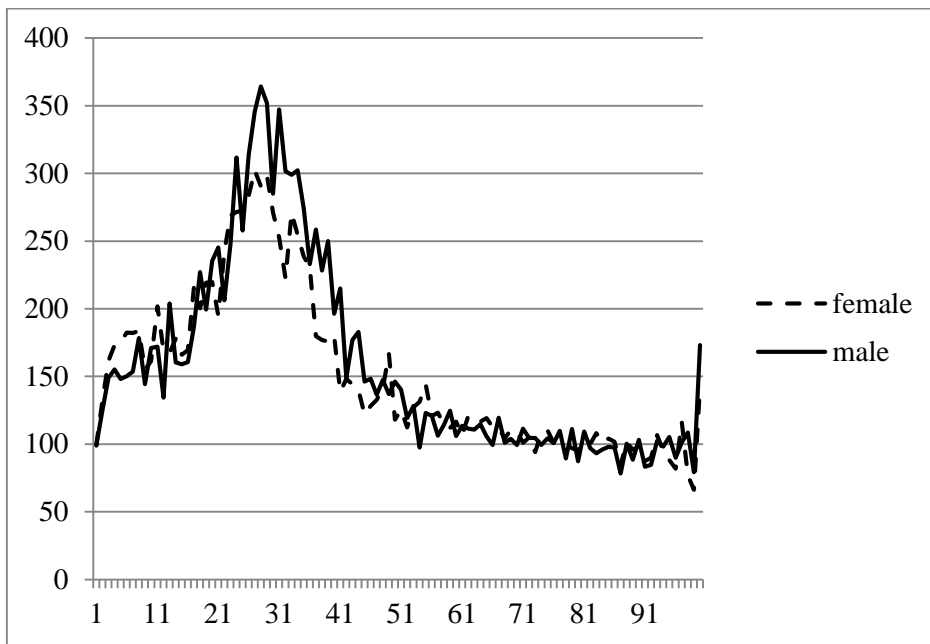

Source: Befolkningsrörelsen 1917, 1918.

Figure A6. Monthly number of live births in Sweden, by conception cohort (nine months before birth), 1914-1925. The shaded vertical bars represent the period October-December 1918.

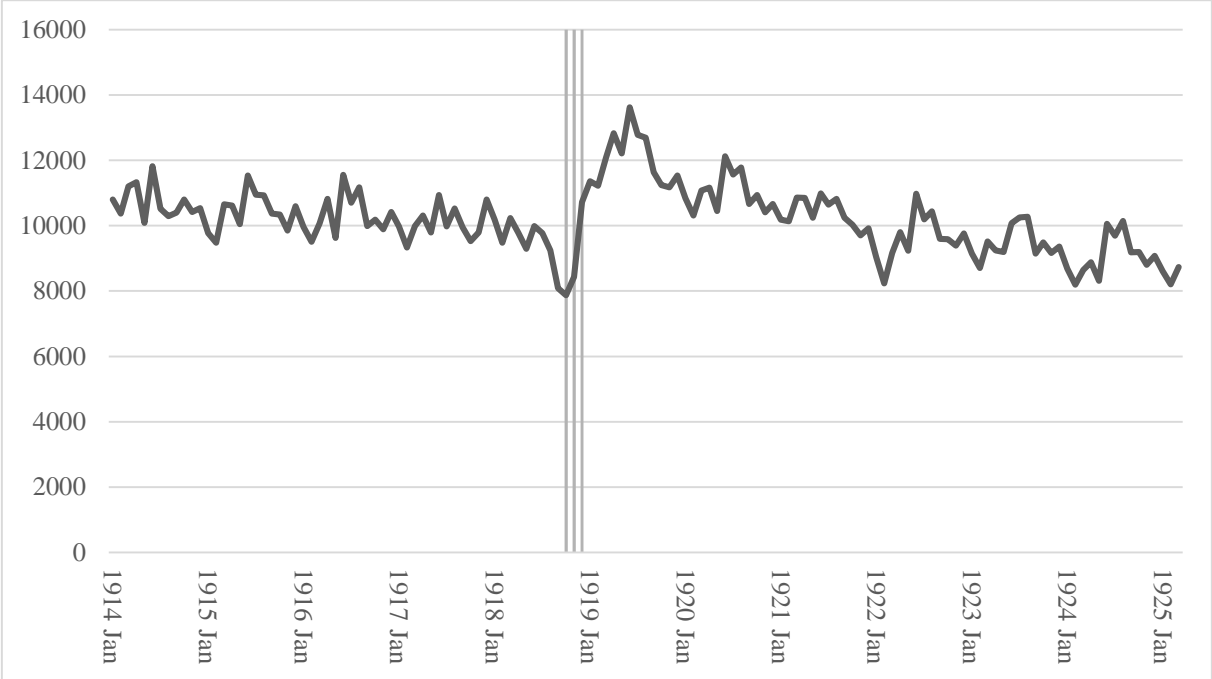

Source: Befolkningsrörelsen 1914-1926



Figure A7. Percentage of high SES fathers and fathers under the age of 30, 1911-1930, Sweden

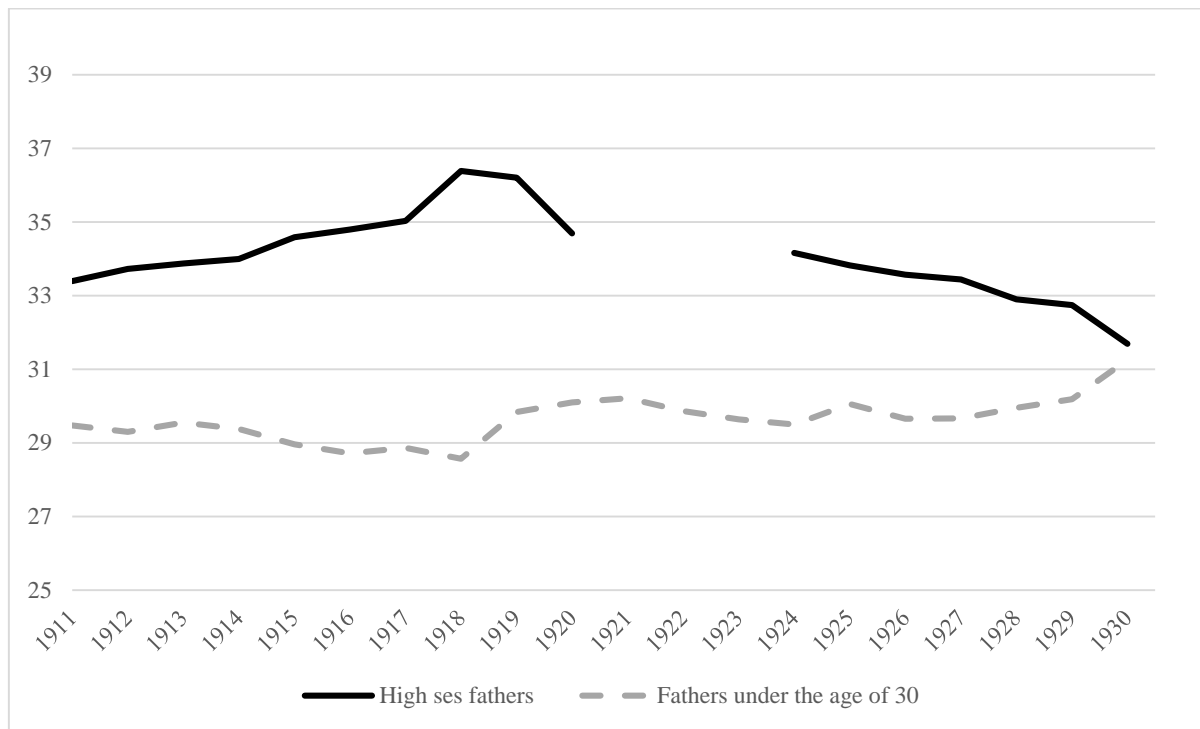

Source: Befolkningsrörelsen 1911-1930

Figure A8. Sex ratio at birth, by month, Sweden 1914-1925. The shaded vertical bars represent the period October-December 1918. The shaded area represents the main cohorts exposed to the influenza pandemic during trimester one.

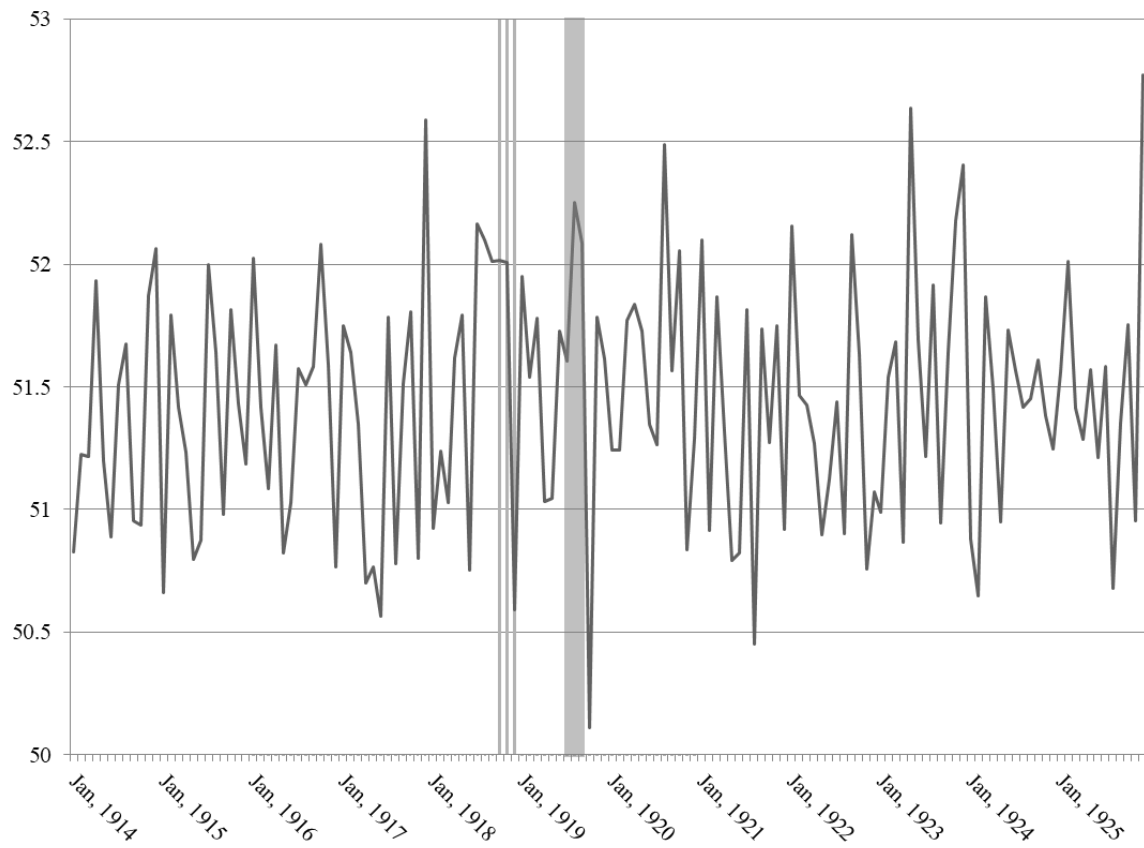

Source: Befolkningsrörelsen 1914-1925.

Figure A9a. Age specific mortality, age 0-1, by birth quarter 1912-1924. Hazard ratios obtained from Cox proportional hazards regression models. Reference category, Q1 1919.

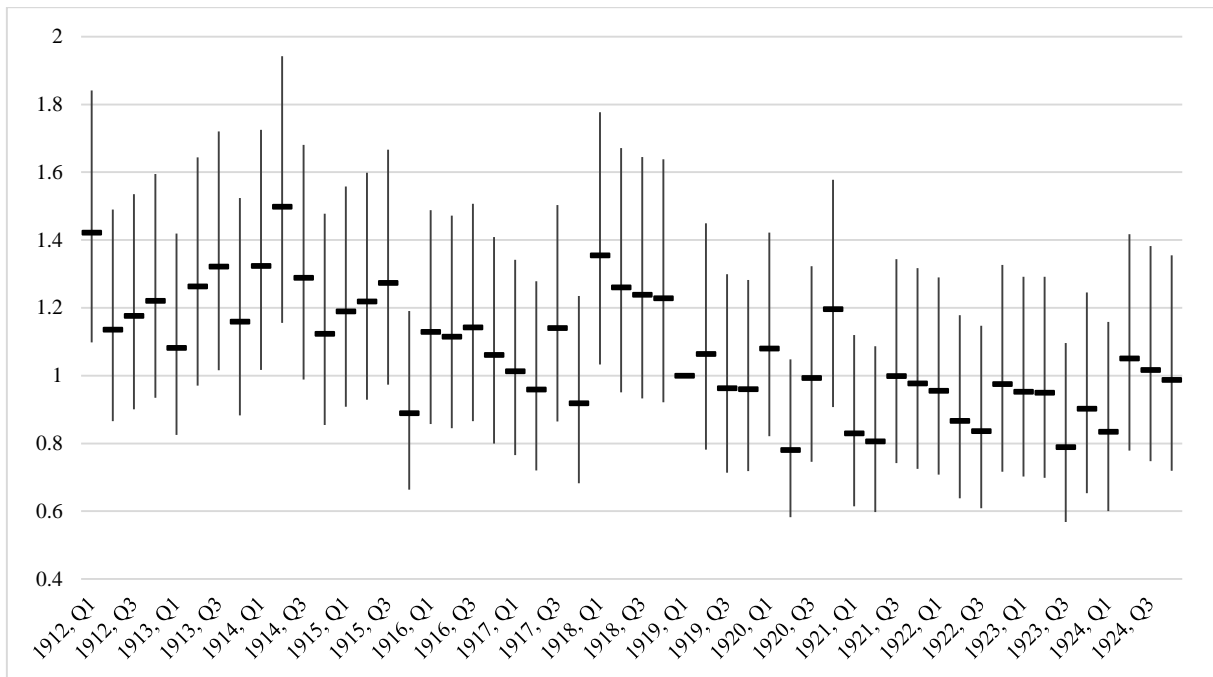

Source: Sveriges släktforskarförbund. Sveriges dödbok, 1901-2013.

Figure A9b. Age specific mortality, age 1-5, by birth quarter 1912-1924. Hazard ratios obtained from Cox proportional hazards regression models. Reference category, Q1 1919.

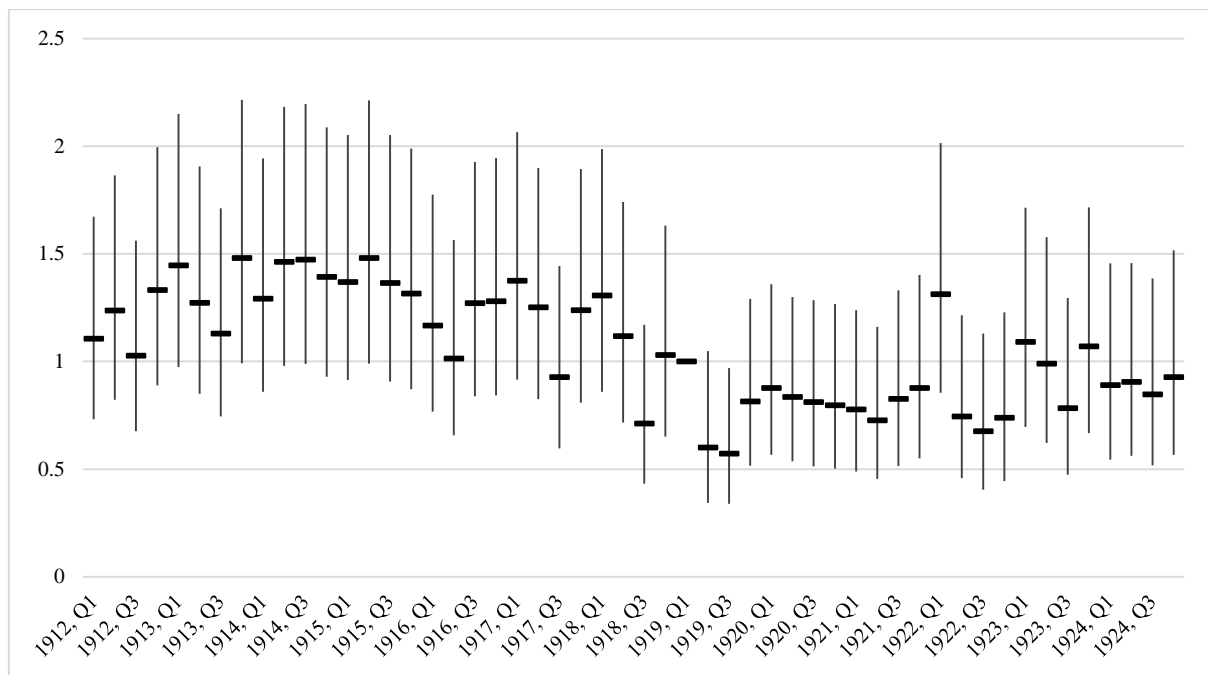

Source: Sveriges släktforskarförbund. Sveriges dödbok, 1901-2013.

Figure A9c. Age specific mortality, age 5-10, by birth quarter 1912-1924. Hazard ratios obtained from Cox proportional hazards regression models. Reference category, Q1 1919.

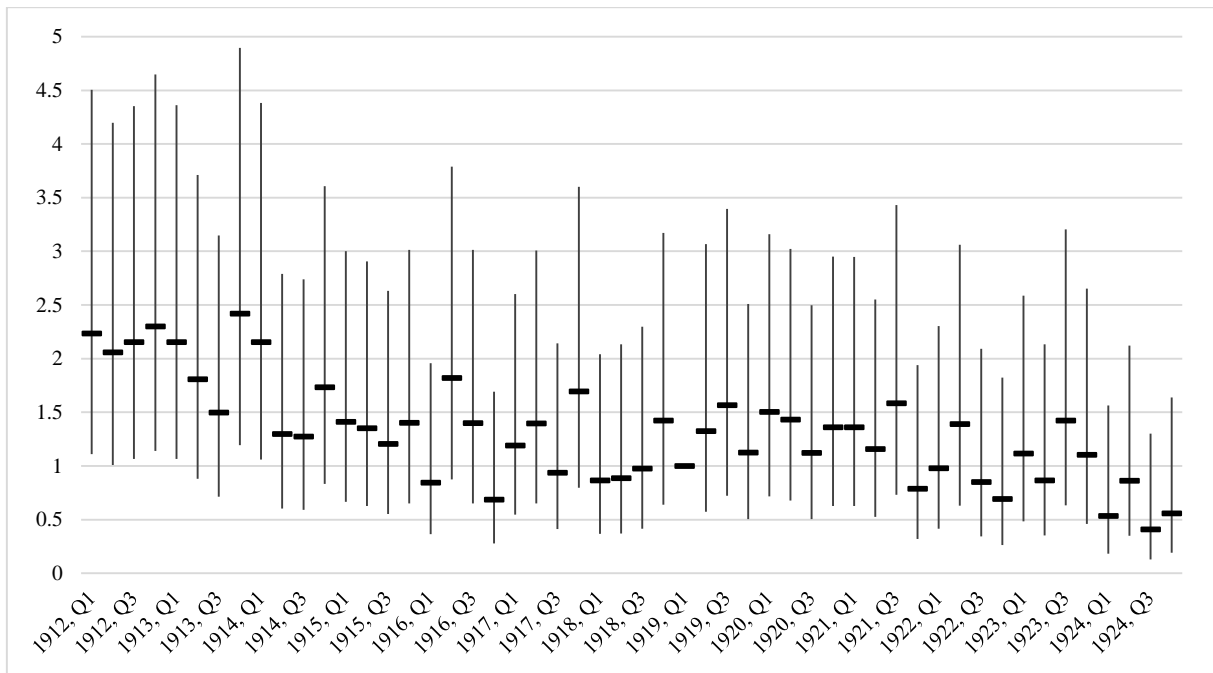

Source: Sveriges släktforskarförbund. Sveriges dödbok, 1901-2013.

Figure A9d. Age specific mortality, age 10-15, by birth quarter 1912-1924. Hazard ratios obtained from Cox proportional hazards regression models. Reference category, Q1 1919.

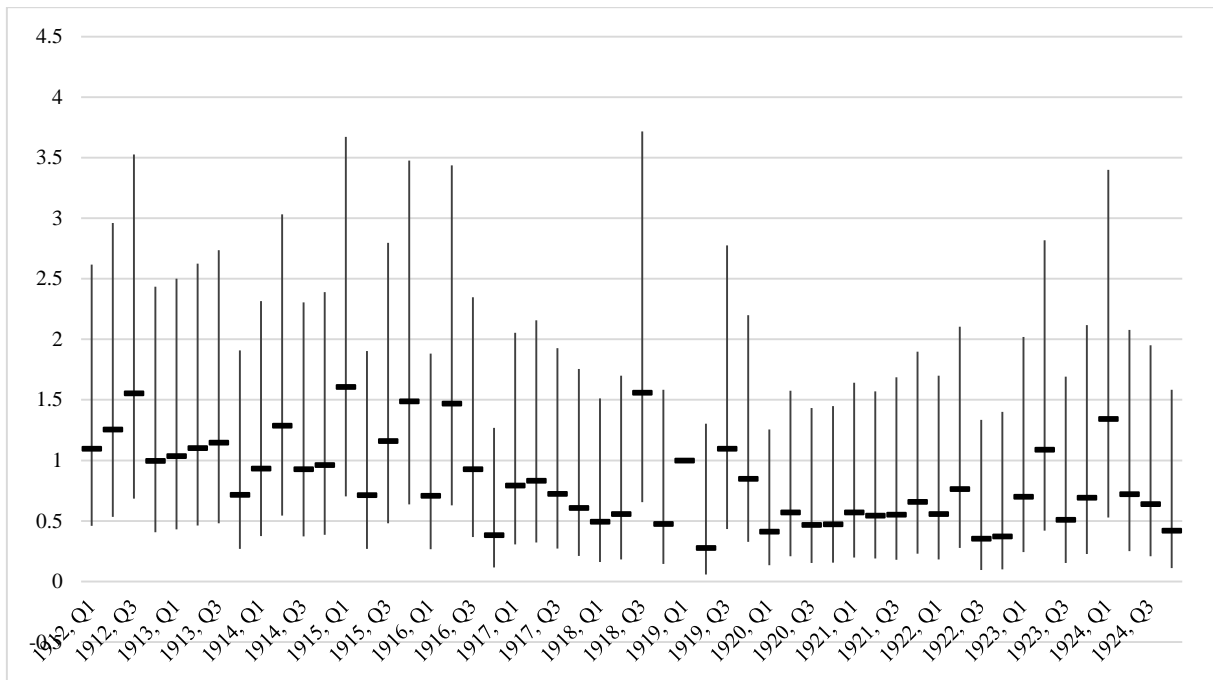

Source: Sveriges släktforskarförbund. Sveriges dödbok, 1901-2013.

Figure A10. Influenza exposure periods, by county.

| County                               | 1918 |                      |                      |                      |                      | 1919                 |                      |                      |                      | Max relative CDR |
|--------------------------------------|------|----------------------|----------------------|----------------------|----------------------|----------------------|----------------------|----------------------|----------------------|------------------|
|                                      | Aug  | Sep                  | Okt                  | Nov                  | Dec                  | Jan                  | Feb                  | Mar                  | Apr                  |                  |
| Stockholm                            |      |                      | Medium mortality     | Medium mortality     | Medium mortality     |                      |                      |                      |                      | 304              |
| Uppsala                              |      |                      | Medium mortality     |                      |                      | Medium mortality     |                      |                      |                      | 335              |
| Södermanland                         |      |                      | Medium mortality     |                      |                      |                      |                      |                      |                      | 389              |
| Östergötland                         |      |                      | Medium mortality     |                      |                      |                      |                      |                      |                      | 346              |
| Jönköping                            |      |                      | Low mortality county | Low mortality county | Low mortality county | Low mortality county | Low mortality county | Low mortality county | Low mortality county | 276              |
| Kronoberg                            |      |                      | Medium mortality     |                      | Medium mortality     | Medium mortality     |                      |                      |                      | 319              |
| Kalmar                               |      |                      |                      |                      |                      |                      |                      |                      |                      | 310              |
| Gotland                              |      |                      |                      | High mortality       | High mortality       | High mortality       |                      |                      |                      | 506              |
| Blekinge                             |      |                      |                      |                      |                      |                      |                      |                      |                      | 399              |
| Kristianstad                         |      |                      | Low mortality county | Low mortality county | Low mortality county | Low mortality county | Low mortality county | Low mortality county | Low mortality county | 294              |
| Malmöhus                             |      |                      | High mortality       | High mortality       | High mortality       |                      |                      |                      |                      | 439              |
| Halland                              |      |                      | Low mortality county | Low mortality county | Low mortality county | Low mortality county | Low mortality county | Low mortality county | Low mortality county | 249              |
| Göteborgs och Bohus                  |      |                      | Medium mortality     |                      |                      |                      |                      |                      |                      | 399              |
| Älvsborgs                            |      |                      | High mortality       | High mortality       | High mortality       | High mortality       |                      |                      |                      | 466              |
| Skaraborgs                           |      |                      | Low mortality county | Low mortality county | Low mortality county | Low mortality county | Low mortality county | Low mortality county | Low mortality county | 273              |
| Värmland                             |      |                      | Low mortality county | Low mortality county | Low mortality county | Low mortality county | Low mortality county | Low mortality county | Low mortality county | 256              |
| Örebro                               |      |                      | Low mortality county | Low mortality county | Low mortality county | Low mortality county | Low mortality county | Low mortality county | Low mortality county | 289              |
| Västmanland                          |      |                      | Low mortality county | Low mortality county | Low mortality county | Low mortality county | Low mortality county | Low mortality county | Low mortality county | 292              |
| Dalarna                              |      |                      | High mortality       | High mortality       | High mortality       | High mortality       |                      |                      |                      | 438              |
| Gävleborg                            |      |                      | High mortality       | High mortality       | High mortality       | High mortality       |                      |                      |                      | 507              |
| Västernorrland                       |      | Medium mortality     | Medium mortality     | Medium mortality     | Medium mortality     |                      |                      |                      |                      | 394              |
| Jämtland                             |      | High mortality       | High mortality       | High mortality       | High mortality       |                      |                      |                      |                      | 454              |
| Västerbotten                         |      | Low mortality county | Low mortality county | Low mortality county | Low mortality county | Low mortality county | Low mortality county | Low mortality county | Low mortality county | 259              |
| Norrbottn                            |      |                      | Low mortality county | Low mortality county | Low mortality county |                      |                      |                      |                      | 297              |
| Share of mid-1918 population exposed | 0%   | 10%                  | 99%                  | 100%                 | 97%                  | 61%                  | 0%                   | 0%                   | 0%                   | -                |
| Share exposed to high mortality      | 0%   | 2%                   | 24%                  | 25%                  | 25%                  | 15%                  | 0%                   | 0%                   | 0%                   | -                |
| Share exposed to low mortality       | 0%   | 3%                   | 40%                  | 32%                  | 29%                  | 22%                  | 0%                   | 0%                   | 0%                   | -                |

Notes: Influenza period is defined as occurring from the month when the CDR exceeds 1.75, and until it descends below this threshold. Relative CDR is calculated as the CDR in county  $i$  and month  $t$ , divided by the CDR in county  $i$  and month  $t-12$ . High mortality counties are defined as having a maximum relative CDR exceeding 400 %, whereas low mortality counties are defined as having a maximum relative CDR not exceeding 300 %.

Legend:  Low mortality county  High mortality  Medium mortality

Source: Befolkningsrörelsen 1917-1919.

Figure A11. Mean days of annual hospitalization between the age 54 and 87, by birth year and quarter. The shaded vertical bar represents individuals born during Q1, 1919.

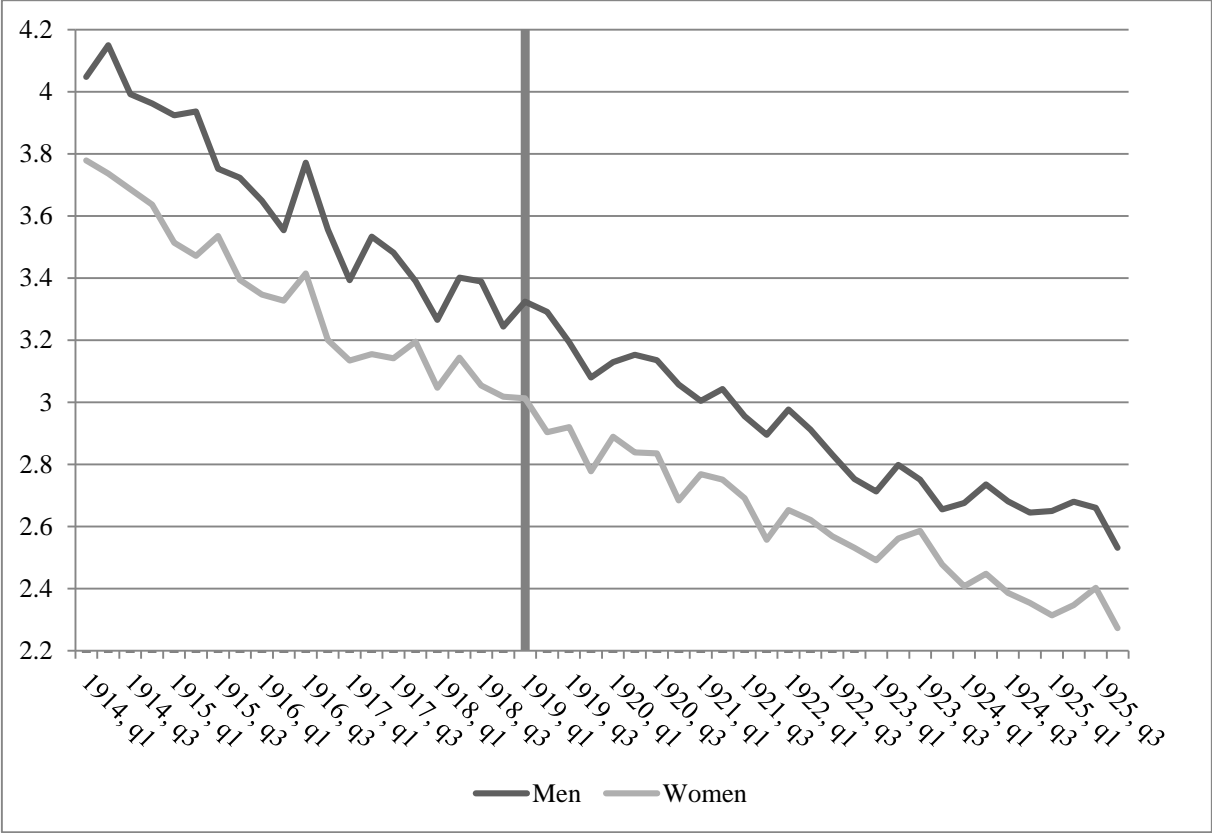

Source: Swedish Interdisciplinary Panel.
